# Supplementary material
Source: Springer Nature journal article supplement (https://www.springermedizin.de/resource/supplementary/13002_2010_219_MOESM4_ESM.pdf/9627408)

Percentage %

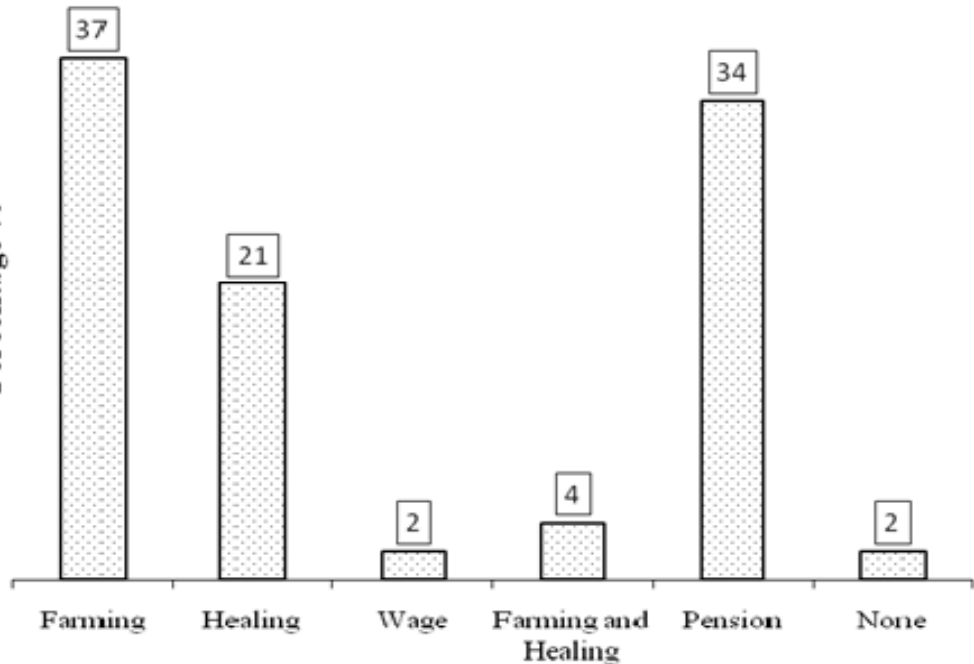

Respondents source of income

Supplement: MOESM4 [file 9627408]
